# Supplementary material
Source: PubMed Central journal article supplement (PMC6410717)
Supplement: NIHMS425907-supplement-1.pdf [file NIHMS425907-supplement-1.pdf]

## **Supplementary data**

### **Title:**

Dendritic Cell-Based Immunotherapy in Prevention and Treatment of Renal Cell Carcinoma: Efficacy, Safety, and Anti-tumor Activity of Ad-GM-CAIX in Immunocompetent Mouse Models.

### **Authors:**

Frédéric D Birkhäuser, Richard C Koya, Caleb Neufeld, Edward N Rampersaud, Xuyang Lu, Ewa D Micewicz, Thirle Chodon, Mohammad Atefi, Nils Kroeger, Gadisetti VR Chandramouli, Gang Li, Jonathan W Said, William H McBride, Fairouz F Kabbinavar, Antoni Ribas, Allan J Pantuck, Arie S Belldegrun§, Joseph Riss§

## Methods

**Cells and cell culture.** RENCA is a spontaneous murine renal cortical adenocarcinoma arising in Balb/c mice and is a model of human adult RCC in immunocompetent syngeneic mice (Balb/c) (1). RENCA cells were a gift from Dr. R. Wilttrout (NCI/NIH) (2). RENCA-CAIX cells were generated by stably transducing the human CAIX gene in RENCA cells (3). NPR-IX cells are hCAIX FACS-purified RENCA-CAIX cells, which repeatedly had >90% hCAIX-positive cells in flow cytometry analysis (**Supplementary Fig. S2**). All cells were cultured in RPMI-1640 medium (Life Technologies, NY) supplemented with 10% FBS (Life Technologies), 1% Pen-Strep (Omega Scientific, CA), 1% MEM non-essential amino acids solution (Life Technologies), and 1% sodium pyruvate (Life Technologies).

***In vitro* DC generation and gene transduction.** Bone marrow cells of 8-week-old female Balb/c mice were induced to differentiate into DCs as described previously by Koya et al (4). The differentiated DCs ( $2.5 \times 10^6$  cells/ml) were cultured in RPMI supplemented with 10% FBS, 1% Pen-Strep, 50 ng/ml mGM-CSF, and 50 ng/ml mL-4. Half were infected with Ad-GM·CAIX (5) (**Supplementary Fig. S3**) and half with an empty adenoviral capsid identical to Ad-GM·CAIX's (Ad-Null; Welgen, MA), each at a multiplicity of infection of 200. After an overnight incubation, the infected DCs were washed with and re-suspended in PBS 1x ( $1.33 \times 10^7$  cells/ml). Using intracellular and extracellular FACS analysis, the expression levels of Cd11c (not shown), Cd86, hCAIX, and hGM-CSF were used to test for DC differentiation and GM·CAIX transduction (**Supplementary Fig. S4 and S5**).

**Western blot.** Rabbit  $\alpha$ -hCAIX (Pierce, IL), mouse  $\alpha$ -hGM-CSF (Pierce, IL), rabbit  $\alpha$ -actin cell signaling, goat  $\alpha$ -rabbit IgG-HRP (Santa Cruz, CA), and goat  $\alpha$ -mouse IgG-HRP

(Santa Cruz, CA) antibodies were used. Chemiluminescence was elicited using the Amersham ECL-Plus (GE Healthcare, NJ) western blotting detection system.

**Immunohistochemistry.** In three mice of each group of the prevention model, pathology-relevant organs, blood, and tumors were collected. Paraffin-embedded sections were cut at 4  $\mu\text{m}$  thickness and rehydrated through graded ethanol. Endogenous peroxidase activity was blocked with 3% hydrogen peroxide in methanol for 10 min. Heat-induced antigen retrieval and proteolytic induced epitope retrieval were used. The slides were then stained with hCAIX (rabbit, 1:1000 dilution, Novus Biological, CO), mCAIX (goat, 1:200, R&D System, MN), Ki67 (rat, 1:100, DAKO, CA), Pecam1 (Cd31) (goat, 1:100, Santa Cruz, CA), Cd11b (rat, 1:50, AbDSerotec, NC), and F4/80 (rat, 1:50, AbDSerotec), and the sections were incubated with secondary rabbit and rat (Cd11b, F4/80, Ki67) or rabbit anti-goat (Cd31, mCAIX) immunoglobulin for 30 min at 1:200 dilution (DakoCytomation). The signal was detected using the Dakocytomation Envision System Labelled Polymer HRP anti rabbit (DakoCytomation) for all. For TUNEL assays, an ApoptagPlus Peroxidase In Situ Apoptosis kit (Millipore, MA) was used. Staining was performed according to the manufacturer's instructions. All sections were visualized with the diaminobenzidine reaction and counterstained with hematoxylin.

**Gene expression analysis.** The gene expression was investigated by Agilent 60-mer oligonucleotide probe arrays (SurePrint G3 Mouse GE 8x60K, Agilent, CA), using the highest absolute value/score among multiple probe sets for the gene-based interpretation. Background corrected signal values determined by Agilent feature extraction software were normalized by median centering of the ratios to a reference, which is the median of all control arrays. The features called *found* by extraction software were considered as present or detected. Global expression profiles of samples were examined by

multidimensional scaling of about 36,000 features that were found at least in 50% of the arrays. Euclidean distance was used as the dissimilarity measure. The features having presence calls in <80% of samples and a geometric mean signal <50 in both groups A and C were eliminated before further analyses. In those remaining, there were 367 mRNA features differentially expressed by 1.5-fold (two tailed p-value < 0.015 by T-test). Ingenuity pathway analyses were done on the datasets of differentially expressed genes ( $P < 0.05$ ). Publicly available literature from 1966 to 2012 was surveyed using CoreMine and PubMed.

**miRNA expression analysis.** Exiqon miRNA arrays (miRCURY LNA™ microRNA array, v6, Exiqon, Denmark) having more than 1,891 capture probes covering all human, mouse, rat, and viral miRNAs and 66 proprietary miRNAs spotted in quadruplicate were used for measuring genome miRNA expression. Intensities were determined by GenePix Pro 6.0 software (Molecular Devices, Sunnyvale, CA) and were normalized by median centering of the ratios to a reference control array. Global miRNA expression profiles of samples were examined by multidimensional scaling of about 4,200 features that were flagged as found in ≥50% of the samples. The features found in <60% of samples in both groups A and C were eliminated from further analysis. There were 104 miRNAs differentially expressed by 1.5-fold (two tailed p-value < 0.015 by T-test), and 11 mouse miRNA replicates appeared 50-100% of the time at signal levels ≥200.

**References**

1. Murphy GP, Hrushesky WJ. A murine renal cell carcinoma. *J Natl Cancer Inst.* 1973;50:1013-25.
2. Wiltout RH, Gregorio TA, Fenton RG, et al. Cellular and molecular studies in the treatment of murine renal cancer. *Semin Oncol.* 1995;22:9-16.
3. Shvarts O, Janzen N, Lam JS, et al. RENCA/carbonic anhydrase-IX: a murine model of a carbonic anhydrase-IX-expressing renal cell carcinoma. *Urology.* 2006;68:1132-8.
4. Koya RC, Kimura T, Ribas A, et al. Lentiviral vector-mediated autonomous differentiation of mouse bone marrow cells into immunologically potent dendritic cell vaccines. *Mol Ther.* 2007;15:971-80.
5. Hernandez JM, Bui MH, Han KR, et al. Novel kidney cancer immunotherapy based on the granulocyte-macrophage colony-stimulating factor and carbonic anhydrase IX fusion gene. *Clin Cancer Res.* 2003;9:1906-16.

## Tables and Figures

## Supplementary Table S1. File “Suppl.\_File\_EXPRESSION.xlsx”

**Supplementary Table S2.** Differentially expressed genes in the tumors that evaded DC-Ad-GM·CAIX immunotherapy versus DC-Ad-Null. (a) Genes in the ontology category “Inflammatory Response.” (b) Genes in the ontology category “Cellular Growth and Proliferation.”

## (A) Gene ontology category: Inflammatory Response

| Functions annotation                              | p-Value  | Molecules                                                                                                                                                                                                  |
|---------------------------------------------------|----------|------------------------------------------------------------------------------------------------------------------------------------------------------------------------------------------------------------|
| Tethering of dendritic cells                      | 1.01E-04 | CD209,ICAM2                                                                                                                                                                                                |
| Adhesion of dendritic cells                       | 2.69E-04 | CD209,ICAM1,ICAM2                                                                                                                                                                                          |
| Transmigration of dendritic cells                 | 3.40E-04 | CD209,ICAM1,ICAM2                                                                                                                                                                                          |
| Immune response                                   | 5.57E-04 | AICDA,ANGPT2,APLN,ASS1,CASP4,CCL1,CD209,CD93,CIITA,CTF1,CXCL9,ELN,F7,FOXJ1,FYB,GJA1,GM2A,GZMA,HMGB1,HMGB1L1,HPGDS,ICAM1,IFI27L2,IFI44L,IL1RL1,Irgm2,LRP1(includes EG:16971),NOD2,PDE4B,SCGB1A1,SOCS1,SOCS2 |
| Cell movement of dendritic cells                  | 6.84E-04 | CCL1,CD207,CD209,CXCL9,HMGB1,ICAM1,ICAM2                                                                                                                                                                   |
| Migration of dendritic cells                      | 7.23E-04 | CD207,CD209,CXCL9,HMGB1,ICAM1,ICAM2                                                                                                                                                                        |
| Cell movement of Langerhans cells                 | 1.18E-03 | CCL1,CD207,ICAM1                                                                                                                                                                                           |
| Cell movement of monocytes                        | 1.56E-03 | ANGPT2,CCL1,CXCL9,ELN,HMGB1,ICAM1,SOCS1                                                                                                                                                                    |
| Cell movement of phagocytes                       | 1.56E-03 | ANGPT2,CCL1,CD207,CD209,CXCL9,ELN,HMGB1,HMGB1L1,ICAM1,ICAM2,IRGM,NOD2,PDE4B,SOCS1                                                                                                                          |
| Migration of phagocytes                           | 1.87E-03 | CCL1,CD207,CD209,CXCL9,HMGB1,HMGB1L1,ICAM1,ICAM2,PDE4B                                                                                                                                                     |
| Adhesion of phagocytes                            | 2.70E-03 | ANGPT2,CD209,HMGB1,ICAM1,ICAM2,IRGM                                                                                                                                                                        |
| Activation of eosinophils                         | 2.75E-03 | CXCL9,HMGB1,IL1RL1                                                                                                                                                                                         |
| Chemotaxis of monocytes                           | 3.03E-03 | ANGPT2,CCL1,CXCL9,ELN,HMGB1                                                                                                                                                                                |
| Aggregation of phagocytes                         | 3.70E-03 | CCL1,CD209,ICAM1                                                                                                                                                                                           |
| Recruitment of monocytes                          | 4.05E-03 | HMGB1,ICAM1,NOD2                                                                                                                                                                                           |
| Cell movement of macrophages                      | 5.99E-03 | ANGPT2,CXCL9,ELN,HMGB1,ICAM1,IRGM,SOCS1                                                                                                                                                                    |
| Activation of mononuclear leukocytes              | 9.73E-03 | AICDA,CD209,CD93,F7,FOXJ1,GZMA,HMGB1,ICAM1,IL1RL1,SOCS1,SOCS2                                                                                                                                              |
| Aggregation of peritoneal macrophages             | 1.01E-02 | CCL1                                                                                                                                                                                                       |
| Contact growth inhibition of alveolar macrophages | 1.01E-02 | HMGB1                                                                                                                                                                                                      |
| Contact growth inhibition of                      | 1.01E-02 | HMGB1                                                                                                                                                                                                      |

|                                                               |          |                                                                                                      |
|---------------------------------------------------------------|----------|------------------------------------------------------------------------------------------------------|
| peritoneal macrophages                                        |          |                                                                                                      |
| Onset of transmigration of neutrophils                        | 1.01E-02 | ICAM1                                                                                                |
| Activation of leukocytes                                      | 1.10E-02 | AICDA,CD209,CD93,CXCL9,F7,FOXJ1,GZMA,HMGB1,HMGB1L1,ICAM1,IL1RL1,LRP1 (includes EG:16971),SOCS1,SOCS2 |
| Inflammation of secretory structure                           | 1.25E-02 | FOXJ1,SOCS1                                                                                          |
| Aggregation of antigen presenting cells                       | 1.39E-02 | CCL1,CD209                                                                                           |
| Migration of Langerhans cells                                 | 1.39E-02 | CD207,ICAM1                                                                                          |
| Binding of macrophages                                        | 1.40E-02 | CD209,HMGB1,ICAM1                                                                                    |
| Inflammatory response                                         | 1.41E-02 | ANGPT2,CASP4,CCL1,CTF1,CXCL9,ELN,F7,HMGB1,ICAM1,IL1RL1,NOD2,PDE4B,SCGB1A1,SOCS1                      |
| Chemotaxis of myeloid cells                                   | 1.60E-02 | ANGPT2,CCL1,CXCL9,ELN,HMGB1,NOD2,PDE4B                                                               |
| Inflammation of cells                                         | 1.63E-02 | HMGB1,HMGB1L1,ICAM1,IL1RL1                                                                           |
| Acute inflammatory response                                   | 1.71E-02 | CTF1,HMGB1                                                                                           |
| Aggregation of myeloid cells                                  | 1.71E-02 | CCL1,ICAM1                                                                                           |
| Infiltration by monocytes                                     | 1.71E-02 | ANGPT2,SOCS1                                                                                         |
| Chemotaxis of phagocytes                                      | 1.86E-02 | ANGPT2,CCL1,CXCL9,ELN,HMGB1,NOD2,PDE4B                                                               |
| Activation of peripheral blood leukocytes                     | 1.88E-02 | F7,SOCS1                                                                                             |
| Cell movement of bone marrow-derived macrophages              | 1.88E-02 | HMGB1,IRGM                                                                                           |
| Quantity of neutrophils                                       | 1.92E-02 | GJA1,HMGB1,ICAM1,PDE4B                                                                               |
| Experimentally induced airway hyperresponsiveness of organism | 2.01E-02 | IL1RL1                                                                                               |
| Homing of endothelial progenitor cells                        | 2.01E-02 | IGFBP3                                                                                               |

## (B) Gene ontology category: Cellular Growth and Proliferation

| Functions annotation                 | p-Value  | Molecules                                                                                                                                                                                                                                                                                                                                                                       |
|--------------------------------------|----------|---------------------------------------------------------------------------------------------------------------------------------------------------------------------------------------------------------------------------------------------------------------------------------------------------------------------------------------------------------------------------------|
| Proliferation of cells               | 7.39E-05 | ADAMTS1,AICDA,ANGPT2,APLN,C8orf4,CAMK2A,CD209,CDH16,CHRNA1,CIITA,CREG1,CTF1,CXCL9,DLK1,ELN,EMP2,ESM1,F7,FGL2,FOXJ1,FYB,GJA1,Gm4617/Ptma,HMGB1,HMGB1L1,HPGDS,ICAM1,IGFBP3,IL1RL1,INHBB,IRGM,JUN,LAMA4,LAMB1,LOX,LRP1 (includes EG:16971),MCC,Ms4a4b (includes others),NOD2,Prl2c2 (includes others),RCAN1,REG1A,RGS16,SCGB1A1,SERPINE2,SOCS1,SOCS2,TGFBI,TP53I11,TXLNA,WWOX,ZIC1 |
| Proliferation of smooth muscle cells | 2.80E-03 | CTF1,ELN,F7,GJA1,HMGB1,IGFBP3,JUN,LRP1 (includes EG:16971)                                                                                                                                                                                                                                                                                                                      |

|                                                    |          |                                                                                                                       |
|----------------------------------------------------|----------|-----------------------------------------------------------------------------------------------------------------------|
| Growth of fibroblasts                              | 5.18E-03 | CTF1,IGFBP3,JUN,SOCS1,TPM1 (includes EG:22003)                                                                        |
| Proliferation of blood cells                       | 8.32E-03 | CD209,CHRNA1,CTF1,FGL2,FOXJ1,FYB, HMGB1,HPGDS,ICAM1, IL1RL1,IRGM, LOX, Ms4a4b (includes others),SCGB1A1, SOCS1, TXLNA |
| Formation of osteoclast-like cells                 | 9.76E-03 | ICAM1,TM7SF4                                                                                                          |
| Generation of gamma-delta T lymphocytes            | 1.01E-02 | JUN                                                                                                                   |
| Growth of cerebellar external germinal layer cells | 1.01E-02 | ZIC1                                                                                                                  |
| Inhibition of tumor-associated macrophages         | 1.01E-02 | HMGB1                                                                                                                 |
| Proliferation of proepicardial cells               | 1.01E-02 | GJA1                                                                                                                  |
| Stimulation of chronic lymphocytic leukemia cells  | 1.01E-02 | TXLNA                                                                                                                 |
| Stimulation of prostate cancer cell lines          | 1.01E-02 | IGFBP3                                                                                                                |
| Proliferation of Th2 cells                         | 1.11E-02 | IL1RL1,SOCS1                                                                                                          |
| Proliferation of T lymphocytes                     | 1.24E-02 | CD209,CHRNA1,FGL2,FOXJ1,FYB,HMGB1, ICAM1,IL1RL1,IRGM, Ms4a4b (includes others),SCGB1A1,SOCS1                          |
| Stimulation of cells                               | 1.25E-02 | ANGPT2,CD209,CHRNA1,FGD3,HMGB1, HMGB1L1,IGFBP3,TXLNA                                                                  |
| Proliferation of lymphocytes                       | 1.26E-02 | CD209,CHRNA1,FGL2,FOXJ1,FYB,HMGB1, HPGDS,ICAM1,IL1RL1, IRGM,Ms4a4b (includes others),SCGB1A1,SOCS1,TXLNA              |
| Growth of endocrine cells                          | 1.71E-02 | C8orf4,SOCS1                                                                                                          |
| Proliferation of Schwann cells                     | 1.71E-02 | LAMA4,SERPINE2                                                                                                        |
| Growth of thyroid cells                            | 2.01E-02 | C8orf4                                                                                                                |
| Proliferation of adrenal glomerulosa cells         | 2.01E-02 | ANGPT2                                                                                                                |
| Proliferation of naive helper T cells              | 2.01E-02 | ICAM1                                                                                                                 |
| Stimulation of adrenal glomerulosa cells           | 2.01E-02 | ANGPT2                                                                                                                |
| Stimulation of peripheral blood lymphocytes        | 2.01E-02 | CHRNA1                                                                                                                |



**Supplementary Table S3.** List of qPCR primers

| Gene              | Species | Vendor                                                                                                      |
|-------------------|---------|-------------------------------------------------------------------------------------------------------------|
| CA9               | Human   | 5' CCCCAGAATAATGCCACAGGGA-3';<br>5'-GCCTAGGCTGGGGTATGGGAGG-3';<br>Integrated DNA Technologies Inc (IDT, CA) |
| Car9              | Mouse   | 5'-CAGCTGCATGGCCTCCCTGG-3';<br>5'-TCCCCCTGCATCCCGGACAG-3';<br>Integrated DNA Technologies Inc (IDT, CA)     |
| H-2D <sup>d</sup> | Mouse   | Koch et al (2006) Immunol 119(1):98-115;<br>Integrated DNA Technologies Inc (IDT, CA)                       |
| H-2K <sup>d</sup> | Mouse   | Koch et al (2006) Immunol 119(1):98-115;<br>Integrated DNA Technologies Inc (IDT, CA)                       |
| Ccl1              | Mouse   | Applied Biosystems (AB, CA)                                                                                 |
| Cxcl9             | Mouse   | Applied Biosystems (AB, CA)                                                                                 |
| Hmgb1             | Mouse   | Applied Biosystems (AB, CA)                                                                                 |
| Fgl2              | Mouse   | Applied Biosystems (AB, CA)                                                                                 |
| Cd209a            | Mouse   | Applied Biosystems (AB, CA)                                                                                 |
| Foxj1             | Mouse   | Applied Biosystems (AB, CA)                                                                                 |
| Klra2             | Mouse   | Applied Biosystems (AB, CA)                                                                                 |
| miR-1186          | Mouse   | Applied Biosystems (AB, CA)                                                                                 |
| miR-98            | Mouse   | Applied Biosystems (AB, CA)                                                                                 |
| miR-5097          | Mouse   | Applied Biosystems (AB, CA)                                                                                 |
| miR-708           | Mouse   | Applied Biosystems (AB, CA)                                                                                 |
| miR-1942          | Mouse   | Applied Biosystems (AB, CA)                                                                                 |
| 18s               | Mouse   | Applied Biosystems (AB, CA)                                                                                 |
| snoRNA234         | Mouse   | Applied Biosystems (AB, CA)                                                                                 |
| snoRNA202         | Mouse   | Applied Biosystems (AB, CA)                                                                                 |

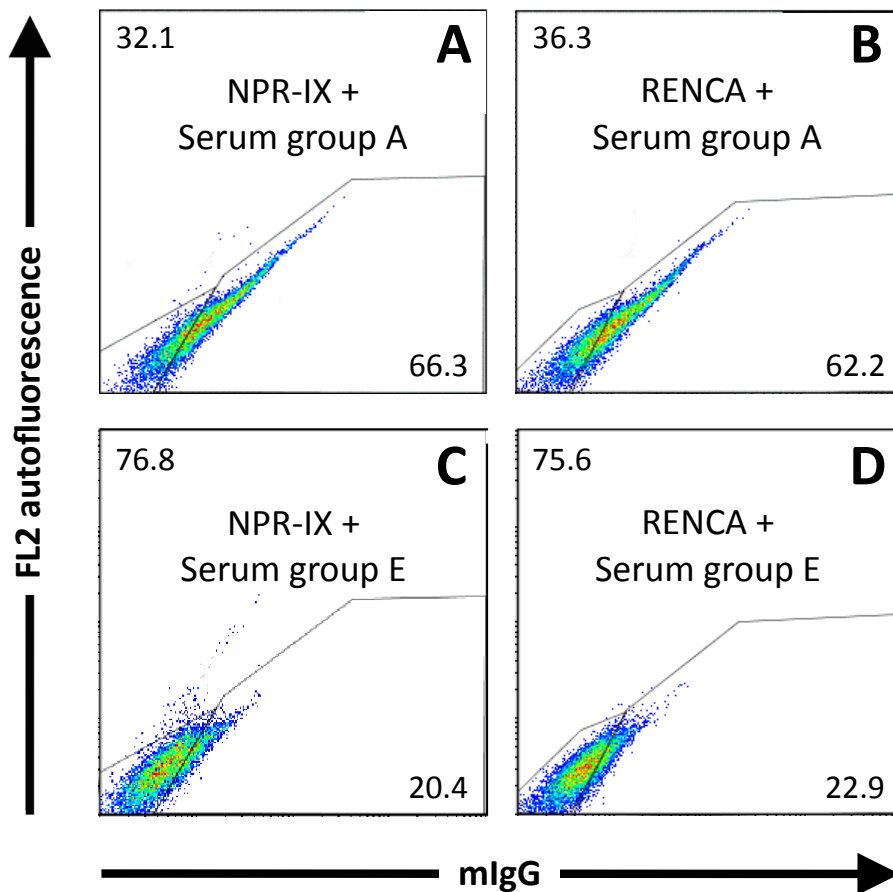

**Supplementary Fig. S1.** Dot plots of indirect FACS for anti-hCAIX antibodies using (A) NPR-IX and (B) RENCA stained by mouse serum from group A, and (C) NPR-IX and (D) RENCA stained by mouse serum from group E, followed by staining with FITC-conjugated anti-mouse IgG. Comparable rates of positive staining for mouse IgG within group A and group E suggest that sera of mice of group A and E do not contain measurable amounts of mouse anti-hCAIX antibodies.

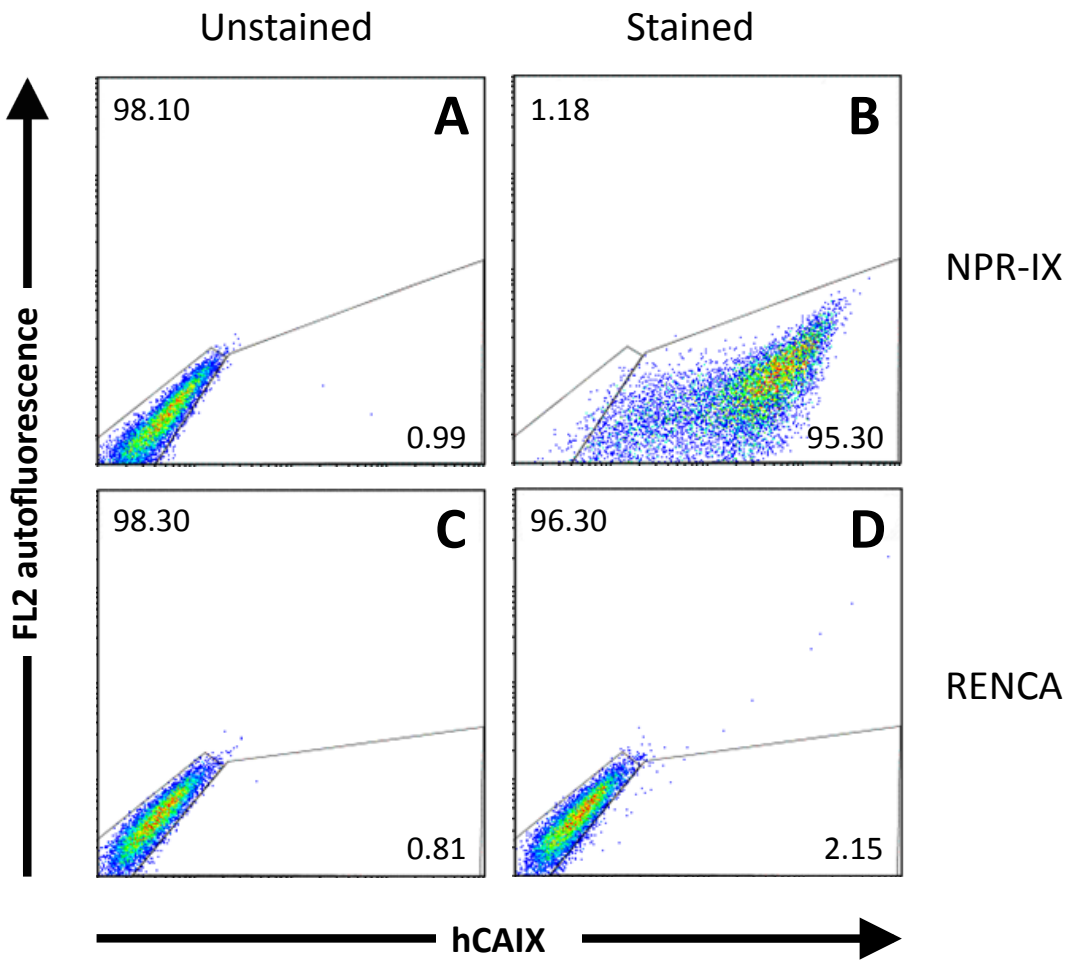

**Supplementary Fig. S2.** Dot plots of FACS for hCAIX in NPR-IX and RENCA cells. (A) Unstained NPR-IX; (B) NPR-IX stained with anti-hCAIX-FITC, showing 95.30% of cells positive for hCAIX expression; (C) Unstained RENCA; (D) RENCA stained with anti-hCAIX-FITC, showing 2.15% of cells positive for hCAIX expression, which is assumed to be an artifact of nonspecific binding.

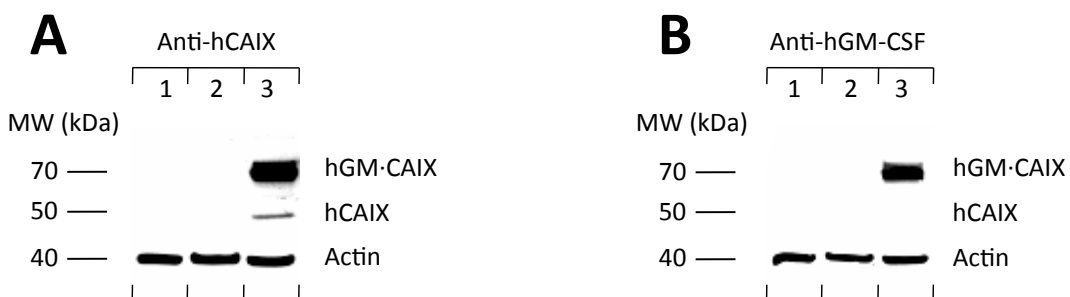

**Supplementary Fig. S3.** Western blot of the fusion protein hGMCAIX.

The 70 kDa weight seen in both blots shows that the hGM-CAIX fusion gene is primarily expressed as a fused protein. Lane 1: 293T control; lane 2: 293T infected with Ad-Null; lane 3: 293T infected with Ad-GM-CAIX; (A) Gel exposed for actin loading control and hCAIX; (B) Gel exposed for actin loading control and hGM-CSF.

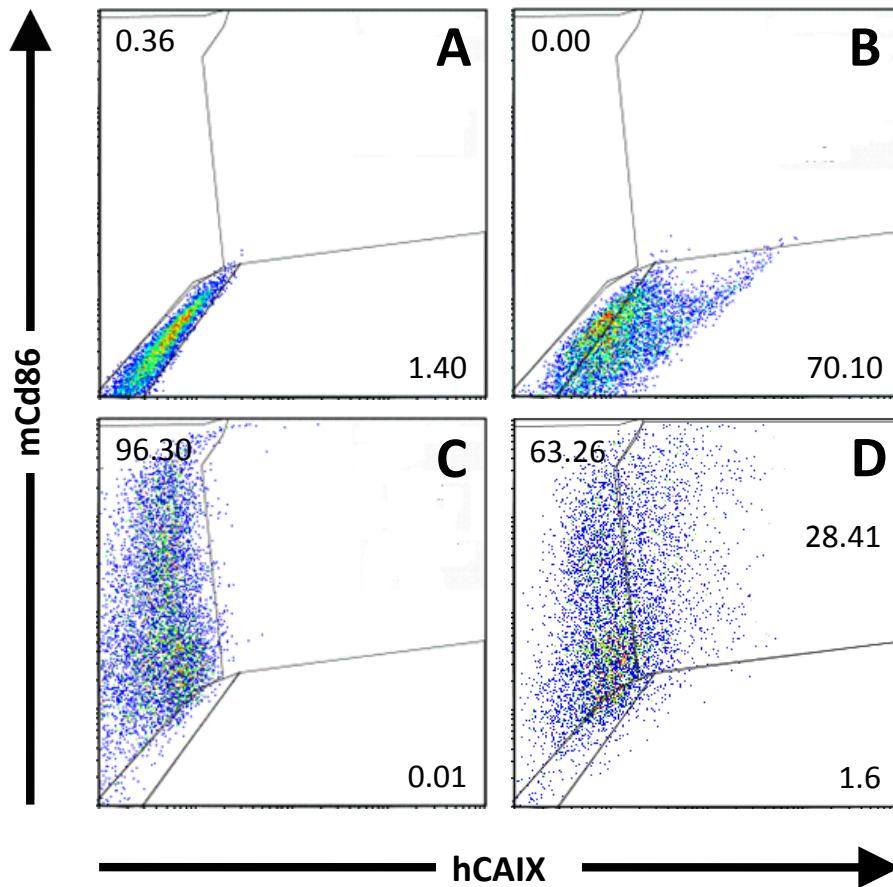

**Supplementary Fig. S4.** Dot plots of FACS for hCAIX (representative of hGM-CAIX expression) and mCd86 in DC-Ad-GM-CAIX; **(A)** Unstained DC-Ad-GM-CAIX; **(B)** DC-Ad-GM-CAIX stained with anti-hCAIX-FITC, showing 70.1% of cells positive for hCAIX expression, indicating successful infection of DCs with Ad-GM-CAIX; **(C)** DC-Ad-GM-CAIX stained with anti-mCd86-PE, showing 96.3% of cells positive for mCd86 expression, indicating successful differentiation from BMCs into DCs; **(D)** DC-Ad-GM-CAIX double-stained with anti-hCAIX-FITC and with anti-mCd86-PE, showing 28.4% of cells positive for both hCAIX and mCd86 expression, representing the percentage of hCAIX-expressing DCs.

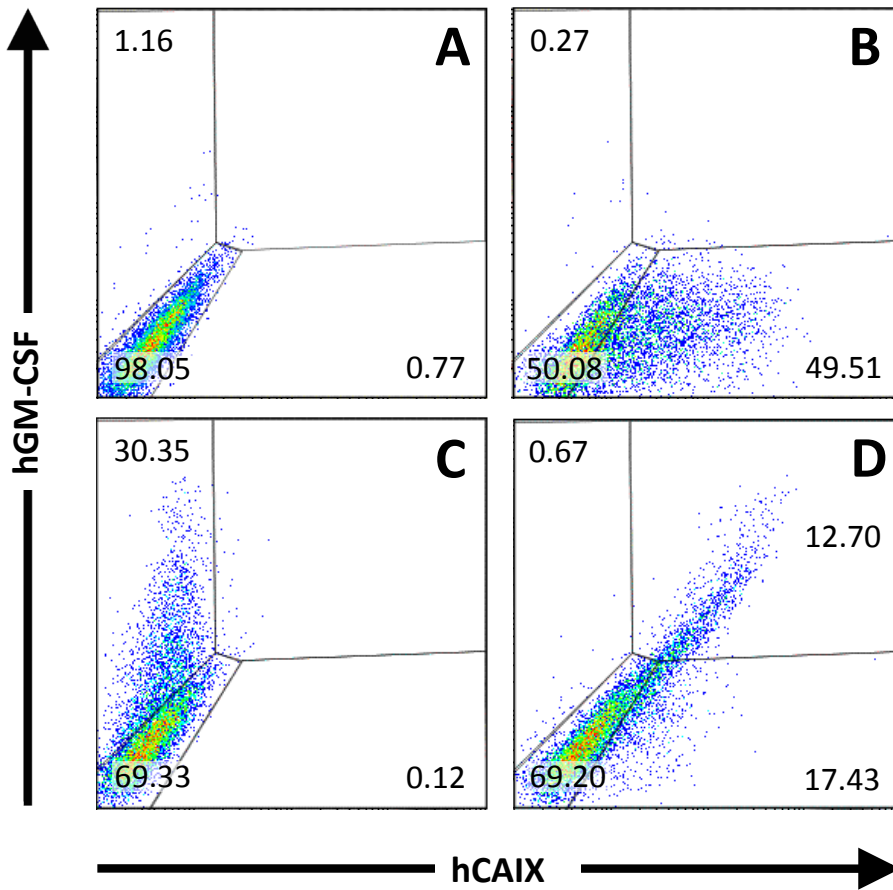

**Supplementary Fig. S5.** Dot plots of FACS for hCAIX and hGM-CSF expression in DC-Ad-GM-CAIX. **(A)** Unstained DC-Ad-GM-CAIX; **(B)** DC-Ad-GM-CAIX stained with anti-hCAIX-FITC, showing 49.51% of cells positive for hCAIX expression; **(C)** DC-Ad-GM-CAIX stained with anti-hGM-CSF-PerCP, showing 30.35% of cells positive for hGM-CSF expression; **(D)** DC-Ad-GM-CAIX double-stained with anti-hCAIX-FITC and anti-hGM-CSF-PerCP, showing 12.70% of cells positive for both hCAIX and hGM-CSF expression.
